# Supplementary material for: Preliminary Investigation on Mandarin Peel Extraction and Development of Functionalized Chitosan-Guar Gum Edible Films Using Response Surface Methodology (RSM)
Source: MDPI journal article supplement (doi:10.3390/foods15050803), 2026-02-24
Supplement: s1 [file foods-4125419-supplementary.pdf › foods-4125419-supplementary.pdf]

## Supplementary Data

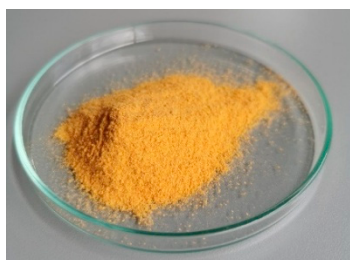

**Figure S1.** Lyophilized mandarin peels (particle size  $<450\ \mu\text{m}$ )

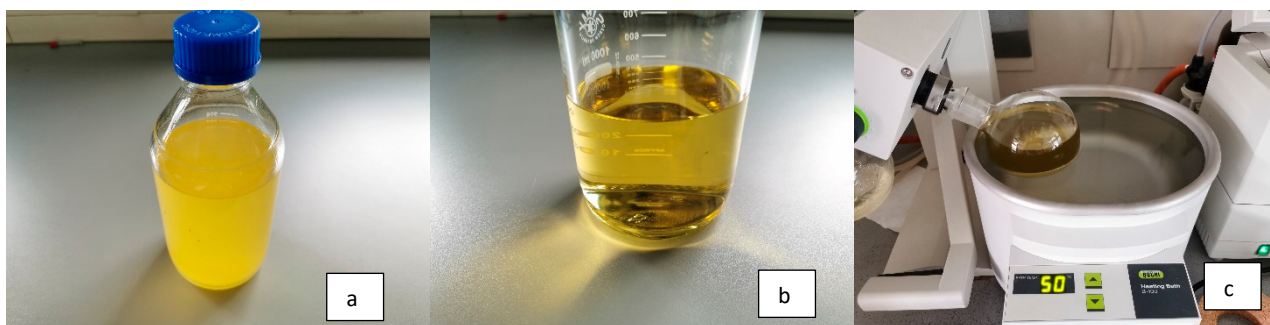

**Figure S2.** Mandarin peel suspension before (a) and after the filtration (b) and subjection to evaporation (c).

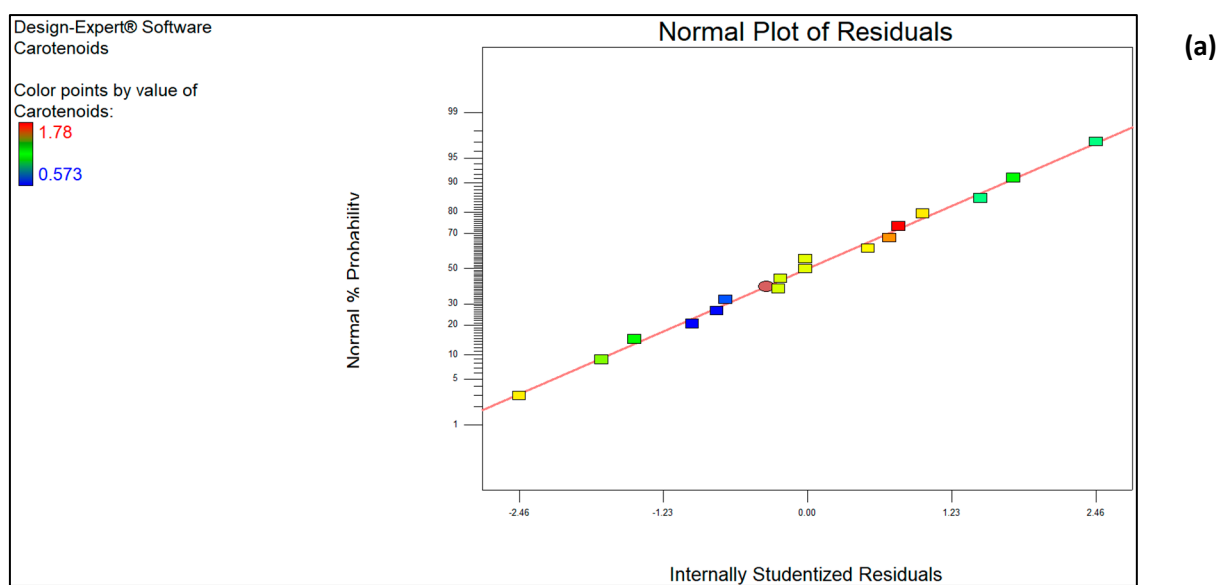

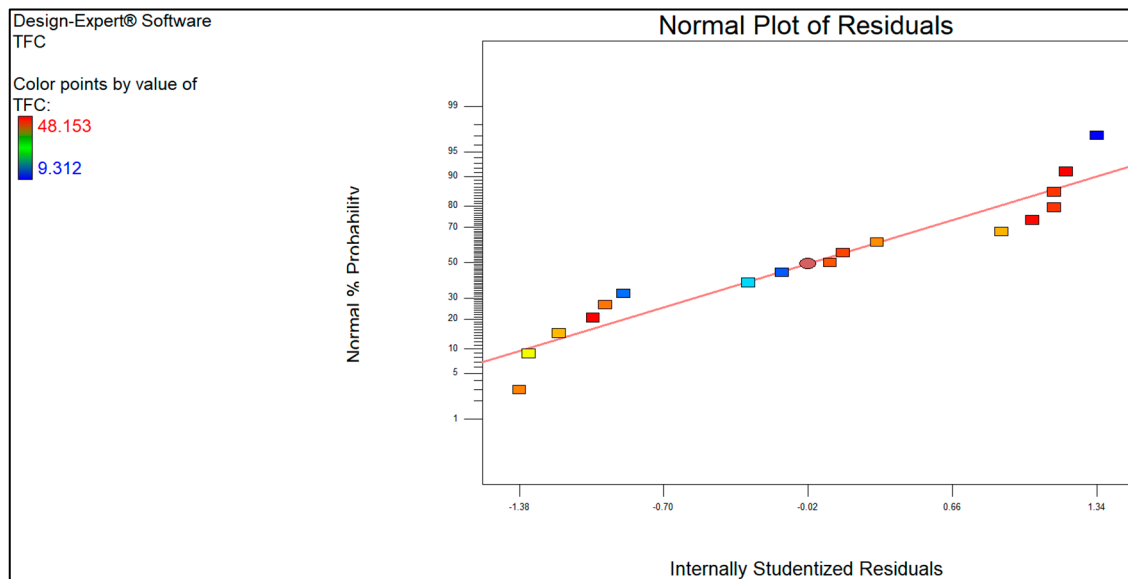

(b)

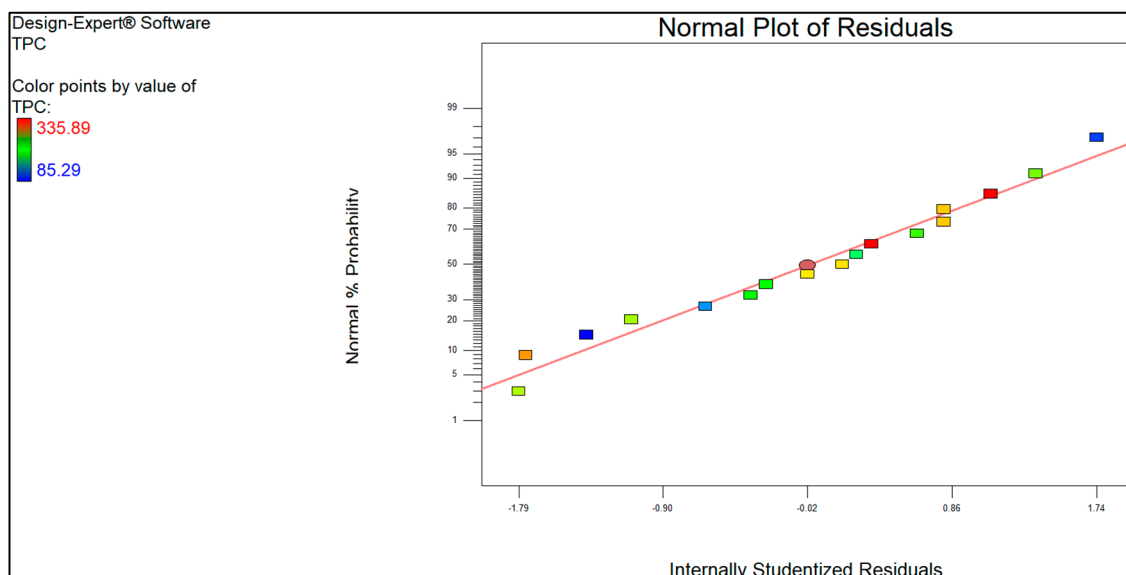

(c)

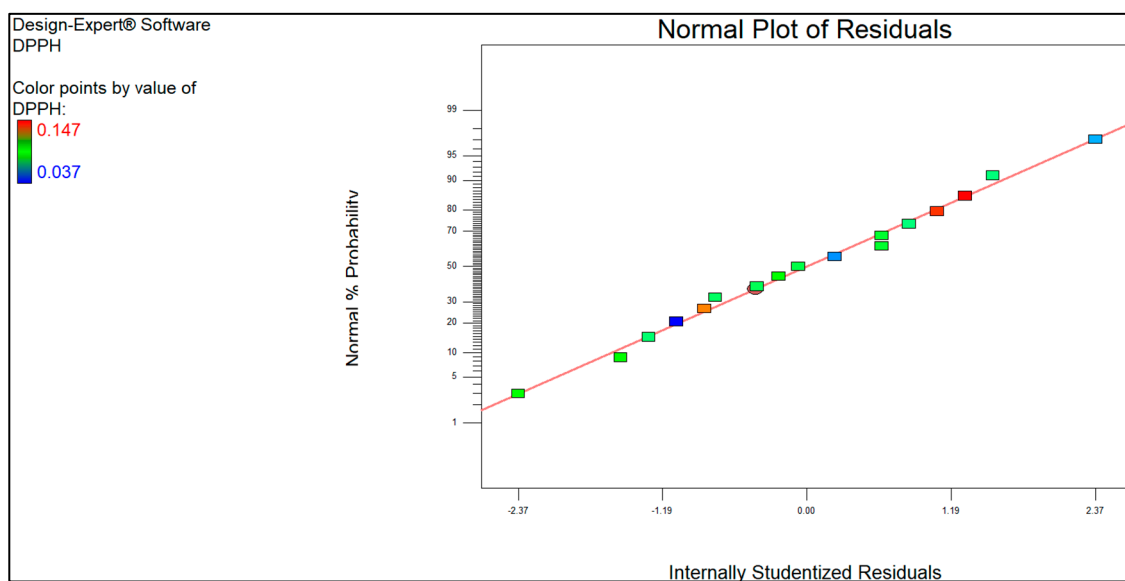

(d)

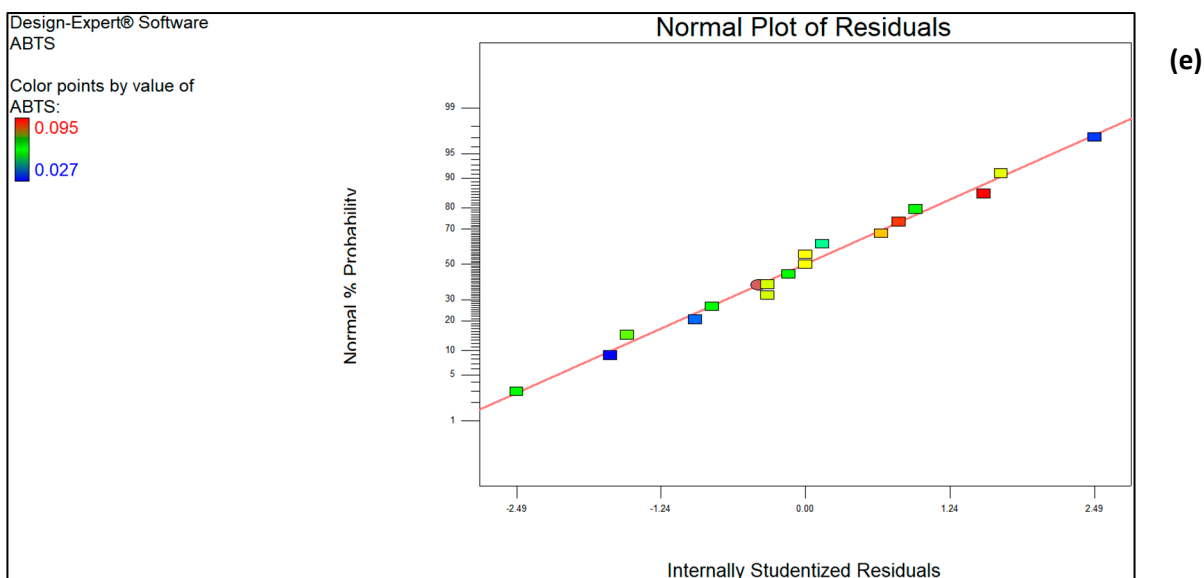

**Figure S3** Normal plots of residuals for Carotenoids (a), Flavonoids (b), Polyphenols (c) DPPH (d) and ABTS (e) response. The near-linear distribution of points indicates normality of residuals

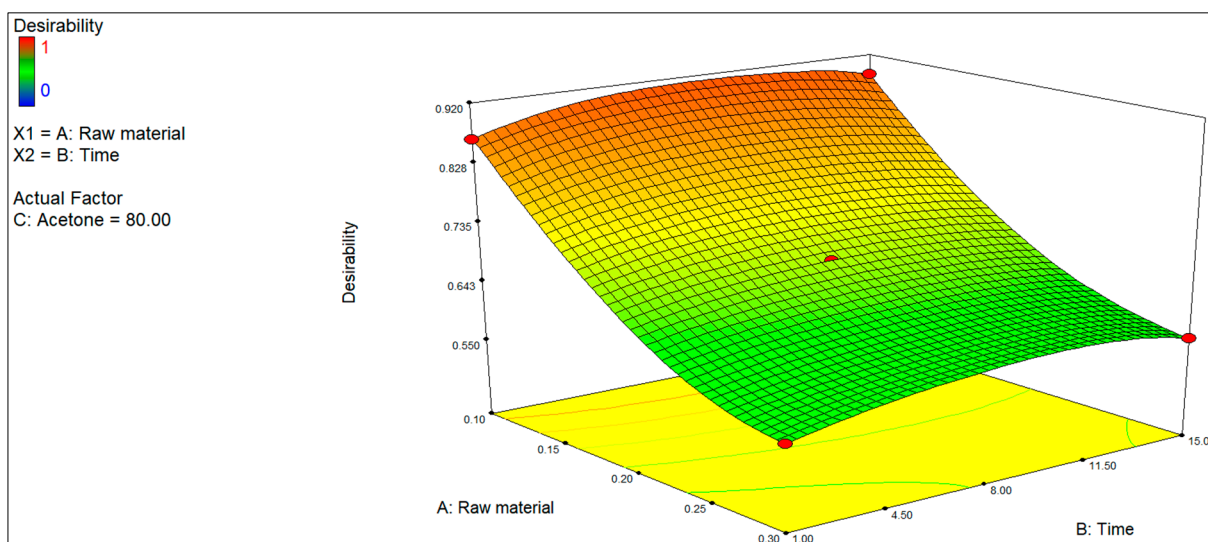

**Figure S4** Response surface plot of overall desirability showing the combined effects of raw material concentration (A) and extraction time (B) at a fixed acetone concentration (80%). Maximum desirability (0.92) was achieved at 0.1% raw material, 8.97 min extraction time, and 80.06% (v/v) acetone.

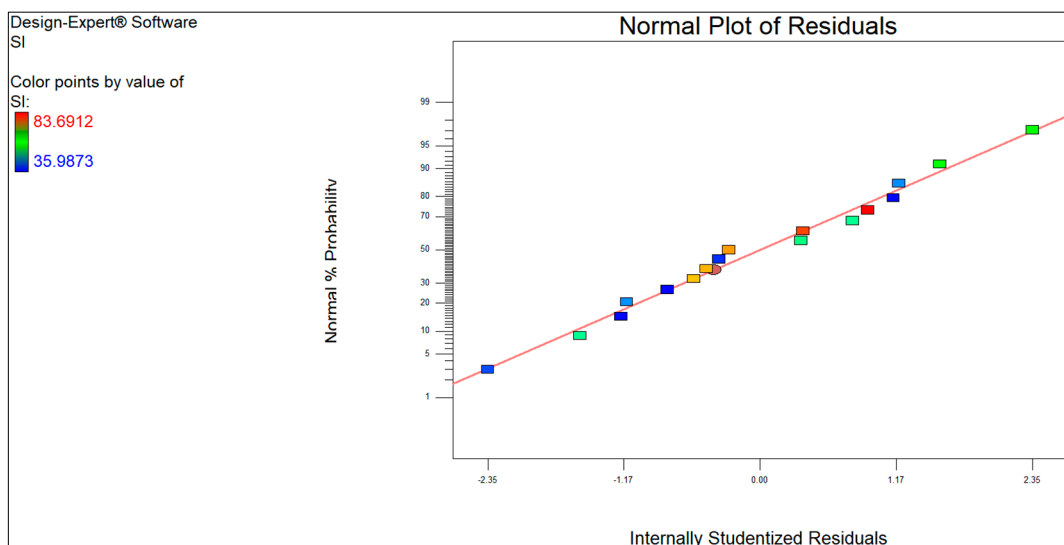

(a)

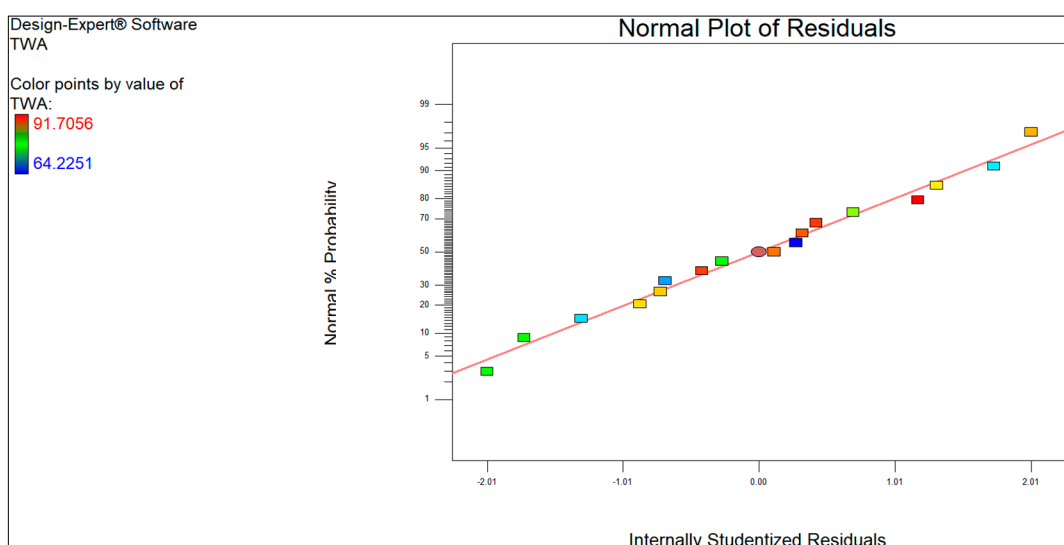

(b)

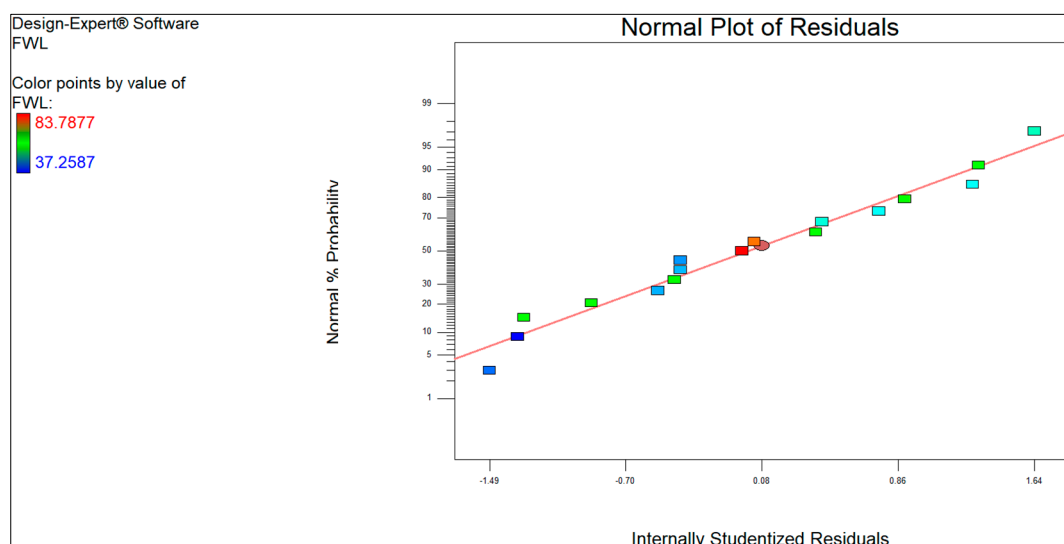

(c)

**Figure S5** Normal plots of residues residuals for Swelling index (a), Total Water absorption (b) and Film Weight loss (c) response. The near-linear distribution of points indicates normality of residuals

Design-Expert® Software

SI  
83.6912  
35.9873

X1 = A: Guar Gum

X2 = B: Glycerol

Actual Factor  
C: Extract = 50.00

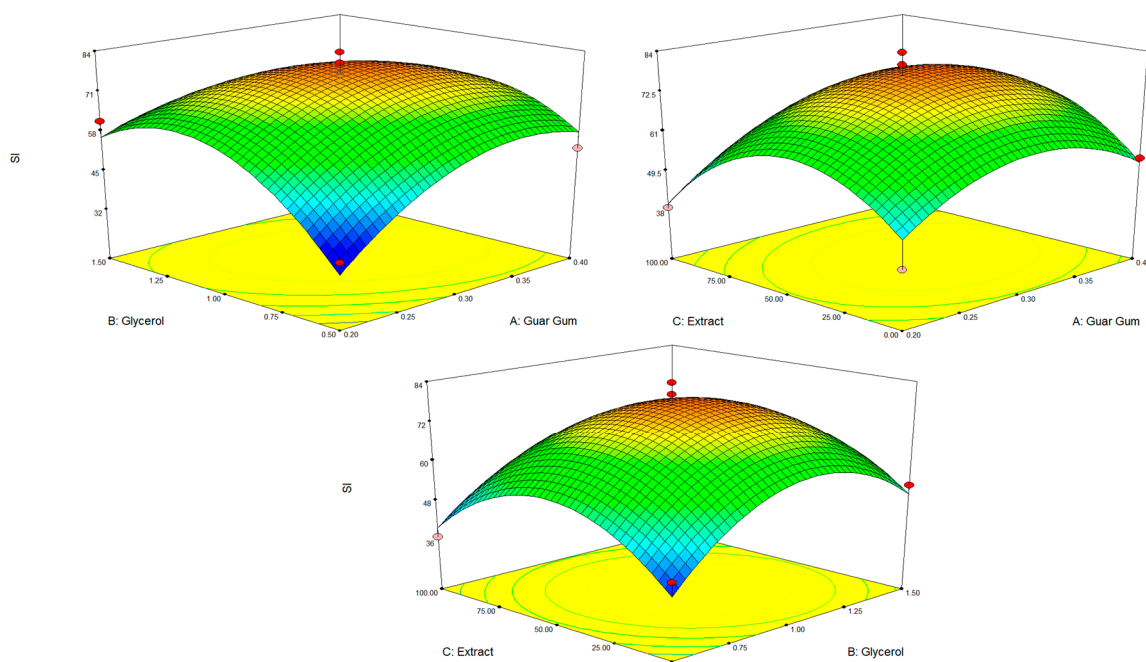

**Figure S6** 3D plots of Swelling Index (SI) showing the interactive effects of Guar gum/chitosan ratio (A) , Glycerol (B) and MPE extract (C)

Design-Expert® Software

TWA  
91.7056  
64.2251

X1 = A: Guar Gum

X2 = B: Glycerol

Actual Factor  
C: Extract = 50.00

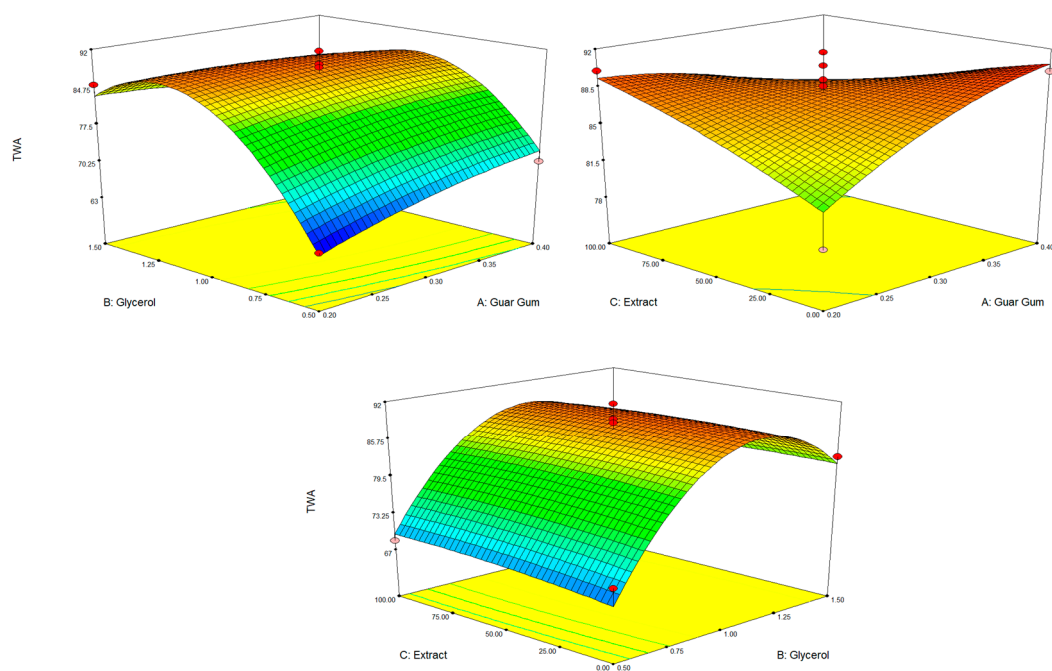

**Figure S7** 3D plots of Total Water Absorption (TWA) showing the interactive effects of Guar gum/chitosan ratio (A) , Glycerol (B) and MPE extract (C)

Design-Expert® Software

FWL

83.7877

37.2587

X1 = A: Guar Gum

X2 = B: Glycerol

Actual Factor

C: Extract = 50.00

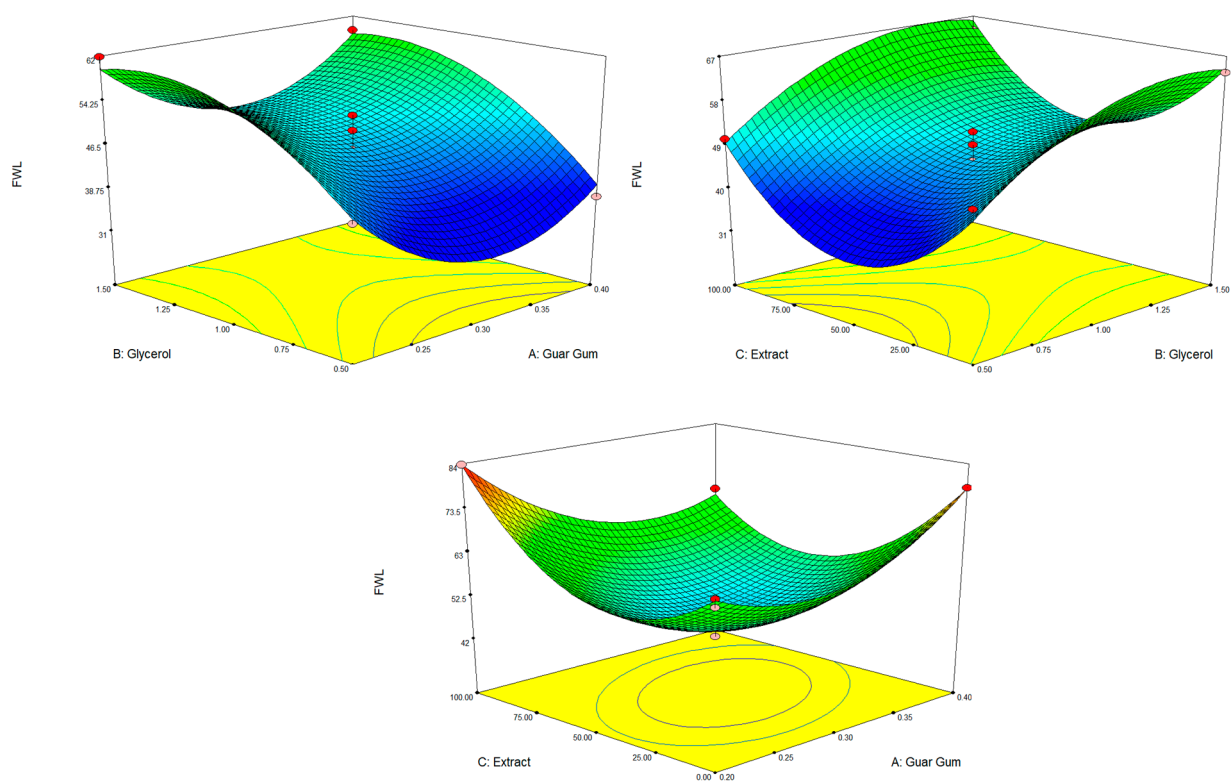

**Figure S8** 3D plots of Film Weight Loss (FWL) showing the interactive effects of Guar gum/chitosan ratio (A) , Glycerol (B) and MPE extract (C)

**Table S1.** Experimental design to optimize the mandarin peel extraction

| <i>Run</i> | <i>F1<br/>Raw material (%)</i> | <i>F2<br/>Time (min)</i> | <i>F3<br/>Acetone (%)</i> |
|------------|--------------------------------|--------------------------|---------------------------|
| 1          | 0.10 (1 g/L)                   | 15.00                    | 80.00                     |
| 2          | 0.20 (2 g/L)                   | 8.00                     | 80.00                     |
| 3          | 0.30 (3 g/L)                   | 8.00                     | 60.00                     |
| 4          | 0.20 (2 g/L)                   | 8.00                     | 80.00                     |
| 5          | 0.10 (1 g/L)                   | 8.00                     | 100.00                    |
| 6          | 0.20 (2 g/L)                   | 15.00                    | 60.00                     |
| 7          | 0.20 (2 g/L)                   | 1.00                     | 60.00                     |
| 8          | 0.30 (3 g/L)                   | 15.00                    | 80.00                     |
| 9          | 0.30 (3 g/L)                   | 8.00                     | 100.00                    |
| 10         | 0.10 (1 g/L)                   | 8.00                     | 60.00                     |
| 11         | 0.20 (2 g/L)                   | 1.00                     | 100.00                    |
| 12         | 0.20 (2 g/L)                   | 8.00                     | 80.00                     |
| 13         | 0.20 (2 g/L)                   | 8.00                     | 80.00                     |
| 14         | 0.30 (3 g/L)                   | 1.00                     | 80.00                     |
| 15         | 0.20 (2 g/L)                   | 8.00                     | 80.00                     |
| 16         | 0.10 (1 g/L)                   | 1.00                     | 80.00                     |
| 17         | 0.20 (2 g/L)                   | 15.00                    | 100.00                    |
